1 **Identification of differences in the magnitude and specificity of SARS-CoV-**  
2 **2 nucleocapsid antibody responses in naturally infected and vaccinated**  
3 **individuals**

4 Pradeep D. Pushpakumara<sup>1</sup>, Chandima Jeewandara<sup>1</sup>, Farha Bary<sup>1</sup>, Deshan Madushanka<sup>1</sup>,  
5 Lahiru Perera<sup>1</sup>, Inoka Sepali Aberathna<sup>1</sup>, Thashmi Nimasha<sup>1</sup>, Jeewantha Jayamali<sup>1</sup>, Thushali  
6 Ranasinghe<sup>1</sup>, Heshan Kuruppu<sup>1</sup>, Saubhagya Danasekara<sup>1</sup>, Ananda Wijewickrama<sup>2</sup>, Graham  
7 S. Ogg<sup>3</sup>, Gathsaurie Neelika Malavige<sup>1,3\*</sup>

8  
9  
10 <sup>1</sup>Allergy Immunology and Cell Biology Unit, Department of Immunology and Molecular  
11 Medicine, University of Sri Jayewardenepura, Nugegoda, Sri Lanka; <sup>2</sup>National Institute of  
12 Infectious Diseases, Angoda, Sri Lanka; <sup>3</sup>MRC Human Immunology Unit, MRC Weatherall  
13 Institute of Molecular Medicine, University of Oxford, Oxford, United Kingdom

14  
15 Correspondence should be addressed to:

16 Prof. Neelika Malavige DPhil (Oxon), FRCP (Lond), FRCPath (UK)

17 Allergy Immunology and Cell Biology Unit, Department of Immunology and Molecular  
18 Medicine, Faculty of Medical Sciences, University of Sri Jayawardanapura, Sri Lanka. Tel  
19 +94 (0) 772443193; Email: [gathsaurie.malavige@ndm.ox.ac.uk](mailto:gathsaurie.malavige@ndm.ox.ac.uk)

20

21

22

## 23 **Abstract**

24 **Background:** As there are limited data on B cell epitopes for the nucleocapsid protein in  
25 SARS-CoV-2, we sought to identify the immunodominant regions within the N protein,  
26 recognized by patients with varying severity of natural infection with the Wuhan strain (WT),  
27 delta, omicron and in those who received the Sinopharm vaccines, which is an inactivated,  
28 whole virus vaccine.

29 **Methods:** Using overlapping peptides representing the N protein, with an in-house ELISA,  
30 we mapped the immunodominant regions within the N protein, in seronegative (n=30), WT  
31 infected (n=30), delta infected (n=30), omicron infected+vaccinated (n=20) and Sinopharm  
32 (BBIBP-CorV) vaccinees (n=30). We then investigated the sensitivity and specificity of these  
33 immunodominant regions and analysed their conservation with other SARS-CoV-2 variants  
34 of concern, seasonal human coronaviruses and bat Sarbecoviruses. We then investigated the  
35 kinetics of responses to these regions in those with varying severity of acute COVID-19.

36 **Results:** We identified four immunodominant regions aa 29-52, aa 155-178, aa 274 to 297  
37 and aa 365 to 388, were highly conserved within SARS-CoV-2 and the bat coronaviruses.  
38 The magnitude of responses to these regions varied based on the infecting SARS-CoV-2  
39 variants, with WT infected individuals predominantly recognizing aa155 to 178 regions, delta  
40 infected individuals and vaccinated+omicron infected individuals predominantly recognizing  
41 regions aa 29 to 52 and aa 274 to 294 regions. Sinopharm vaccinees recognized all four  
42 regions, with the magnitude of responses significantly lower than other groups. >80% of  
43 individuals gave responses above the positive cut-off threshold to many of the four regions,  
44 with some differences with individuals who were infected with different VoCs. These regions  
45 were found to be 100% specific, as none of the seronegative individuals gave any responses.

46 **Conclusions:** N-protein specific responses appear to be detectable in over 90% of those who  
47 were naturally infected or vaccinated with a whole virus inactivated vaccine, with responses  
48 mainly directed against four regions of the protein, which were highly conserved. As these  
49 regions were highly specific with high sensitivity, they have a potential to be used to develop  
50 diagnostic assays and to be used in development of vaccines.

51

52 **Keywords:** SARS-COV-2; nucleocapsid protein; ELISA; overlapping peptides;  
53 immunodominant; conservation; sarbecoviruses; variants; Sinopharm

54

55

56

57

58

59

60

61

62

63

64

65

66

## 67 **Introduction**

68 The SARS-CoV-2 virus continues to evolve, giving rise to more immune evasive and more  
69 transmissible variants, which continue to drive outbreaks globally [21]. Although variants  
70 such as omicron (BA.1) were thought to initially cause milder illness, the sub-lineages that  
71 subsequently emerged such as BA.2, were associated with more severe disease in certain  
72 populations [30]. In fact, BA.2 outbreaks in the United States and in Hong Kong resulted in  
73 several fold higher mortality rates than seen during the delta outbreaks in many countries  
74 [13]. Many factors could contribute to the differences in mortality rates and hospitalization  
75 rates during different outbreaks in different countries such as co-morbidities, age, vaccination  
76 rates of a population, the proportion of individuals naturally infected, COVID-19 control  
77 measures, better treatment modalities, infra-structure to manage hospitalized patients and  
78 seasonal changes [2,5,18]. Among all the factors that have contributed to a reduction in  
79 mortality rates, COVID-19 vaccines, are likely to be one of the single most important factors  
80 that were responsible for this reduction [2,29].

81

82 While neutralization antibodies (Nabs) have shown to associate with protection against  
83 severe disease when infected with the SARS-CoV-2 [1,12], the mRNA COVID-19 vaccines  
84 appear to induce higher levels of Nabs compared to other vaccines [15]. However, there is  
85 emerging evidence that nucleocapsid (N) protein specific antibody responses may be  
86 protective based on data in animal models [8]. Indeed, a high frequency of polyfunctional T  
87 cell responses specific for certain epitopes within the N protein was found to associate with  
88 milder illness [22] and N protein specific antibody responses were detected earlier in  
89 infection and were present at detectable levels in a larger proportion of individuals compared  
90 to spike protein specific antibody responses [6].

91 The N protein is one of the most abundant, highly conserved RNA-binding proteins, which  
92 plays an important role in the packing of the SARS-CoV-2 genome [3]. It plays an important  
93 role in the regulation of the virus replication cycle, inhibits interferon response and induced  
94 apoptosis [3]. The N protein, which spans 419 amino acids, consists of five domains and all  
95 five have shown to bind to RNA [6]. The region starting from the 388 amino acid position  
96 was found to induce a high frequency of immune responses in patients with acute COVID-19  
97 (from the Wuhan strain) and was found to be 100% specific to detect infection with SARS-  
98 CoV-2. Although the N protein is an important T cell and antibody target, the main  
99 immunodominant regions within this protein, targeted by antibodies has not been extensively  
100 studied. For instance, although the N protein is highly conserved, as it is an important  
101 antibody target, certain mutations in SARS-CoV-2 variants of concern (VoC), can give rise to  
102 differences in the magnitude of antibody responses to certain regions. Therefore, we sought  
103 to identify the immunodominant regions within the N protein, recognized by patients with  
104 varying severity of natural infection with the Wuhan strain (WT), delta, omicron and in those  
105 who received the Sinopharm vaccines, which is an inactivated, whole virus vaccine.

106

107

108

109

110

111

112

## 113 **Methods**

### 114 **Participants for identification of immunodominant regions within the N protein**

115 Blood samples from healthy adult volunteers who were either vaccinated or naturally infected  
116 with SARS-CoV-2 were obtained following informed written consent. Serum separated from  
117 blood samples were used to assess antibody responses to the overlapping N peptides in the  
118 following groups of individuals.

119 A. SARS-CoV-2 seronegative negative individuals (n=30) prior to COVID-19  
120 vaccination (negative)

121 B. Unvaccinated individuals who were naturally infected (n=30) with the SARS-CoV-2  
122 wild type/Wuhan strain (WT) from day 14 to 21 from day of onset of symptoms. 5/30  
123 of them had severe illness and 25/30 had mild. Clinical disease severity was classified  
124 according to the WHO COVID-19 disease severity classification [31]. (WT)

125 C. Unvaccinated individuals who were naturally infected with the SARS-CoV-2 delta  
126 variant (n=30), 7 to 21 days from the onset of symptoms. All individuals had mild  
127 infection. (delta)

128 D. Those who were vaccinated or who possibly had prior infection (infection status  
129 unknown) in those who were subsequently infected with omicron (n=20) days 14 to  
130 21 since onset of illness. (Omicron+vaccinated)

131 E. Sinopharm (BBIBP-CorV) vaccine recipients 2 weeks post second dose (n=30)  
132 (Sinopharm)

133

### 134 Ethics statement

135 Blood samples were obtained following informed written consent. Ethics approval was  
136 obtained from the Ethics Review Committee of University of Sri Jayewardenepura.

137 **Participants for assessing the kinetics of antibody responses to immunodominant**  
138 **regions of N protein**

139 After identification of immunodominant regions within the N protein, the responses to these  
140 regions were further assessed in the groups of individuals described above. However, smaller  
141 numbers were included in the analysis due to limitations in the sample volume available.

142 A. SARS-CoV-2 seronegative negative individuals (n=15) prior to COVID-19 vaccination

143 B. Unvaccinated individuals who were naturally infected (n=12) with the SARS-CoV-2 wild  
144 type/Wuhan strain (WT) from day 14 to 21 since onset of illness

145 C. Unvaccinated individuals who were naturally infected with the SARS-CoV-2 delta variant  
146 (n=12), with mild illness, from day 7 to 14 since onset of illness.

147 D. Those who were vaccinated (different vaccines) or who possibly had prior infection  
148 (infection status unknown) in those who were infected with omicron (n=22), 14 to 21 days  
149 since onset of illness. All participated individuals had mild infection.

150 E. Sinopharm (BBIBP-CorV) vaccine recipients 2 weeks post second dose (n=12)

151 F. Uninfected individuals who received COVID-19 vaccines, which only contain the SARS-  
152 CoV-2 spike protein, 3 months since obtaining the second dose. AZD1222 (ChAdOx1)  
153 (n=10), Moderna (mRNA-1273) (n=10) and Sputnik V (Gam-COVID) (n=10). This was to  
154 assess the specificity of the responses to the immunodominant N peptides.

155

156 **Participants with acute infection due to SARS-CoV-2 WT virus**

157 Adult patients who were acute infected with the SARS-CoV-2 virus and had mild illness  
158 (n=16) or severe illness (n=9) during acute stage (<7 days since onset of symptoms) and

159 during late infection (21 to 28 days since onset of symptoms) were recruited following  
160 informed written consent, to compare antibody responses against four immunodominant  
161 regions between individuals with mild and severe disease during early and late stages of the  
162 illness. Clinical disease severity was classified according to the WHO COVID-19 disease  
163 severity classification [31].

164

### 165 **N protein peptide array**

166 Overlapping peptides representing the N protein of SARS-CoV-2 virus (USA-WA1/2020  
167 strain of SARS-CoV-2; QHO60601) was obtained through BEI Resources, NIAID, NIH:  
168 Peptide Array, SARS-Related Coronavirus 2 Nucleocapsid (N) Protein, NR-52404. The  
169 whole peptide array consists of 59 overlapping peptides, which overlap by 10aa to 17aa and  
170 10aa with the adjacent peptide. All peptides were dissolved in appropriate solvent mentioned  
171 by the manufacturer. Initially, all 59 peptides were pooled in to 4 pools. Namely, pool 1  
172 (peptide 1 to 15), pool 2 (peptide 16 to 30), pool 3 (peptide 31-45) and pool 4 (peptide 46-  
173 59). Antibody responses to the peptides which gave the highest responses were further  
174 assessed.

175

### 176 **Identification of SARS-CoV-2 serostatus of the participants**

177 The Wantai SARS-CoV-2 total antibody ELISA (Beijing Wantai Biological Pharmacy  
178 Enterprise, China) was used to identify the presence of antibodies (IgM, IgG and IgA) to the  
179 receptor binding domain (RBD) of the virus. The specificity of this assay in the Sri Lankan  
180 population was found to be 100% [17] SARS-CoV-2. Those who tested negative for the  
181 presence of total antibodies to the RBD by this assay, were considered to be seronegative.



182

183 In those who had received the spike protein contained vaccines, the presence of  
184 asymptomatic infection with the virus was assessed by the presence of N protein specific  
185 antibodies. This was done by using the Elecsys® Anti-SARS-CoV-2  
186 electrochemiluminescence immunoassay (Cat: 09 203 095 190, Roche Diagnostics,  
187 Germany) using the Cobas e 411 analyzer (Roche Diagnostics, Germany). A Cutoff index  
188 (COI)  $\geq 1.0$  was interpreted as reactive and COI  $< 1.00$  was considered non-reactive as  
189 indicated by the manufacturer.

190

#### 191 **Measuring ACE2 blocking antibodies by the surrogate virus neutralizing test (sVNT)**

192 ACE2 blocking antibodies were measured using the sVNT assay which measures the  
193 percentage of inhibition of binding of the RBD of the S protein to recombinant ACE2  
194 (Genscript Biotech, USA). Inhibition percentage  $\geq 25\%$  in a sample was considered as  
195 positive for Nabs in the Sri Lankan population as previously described [26].

196

#### 197 **Identification of SARS-CoV-2 variants in individuals who were naturally infected with** 198 **SARS-CoV-2**

199 In this study we recruited individuals infected with the WT, delta and omicron. All those who  
200 were considered to be infected with the WT had a confirmed SARS-CoV-2 infection (PCR  
201 positive) between in March to May 2020, when other VoC were not detected. Infection with  
202 either delta or omicron was identified by carrying out genomic sequencing using either the  
203 Oxford Nanopore (ONT) or the Illumina platforms as previously [23].

204

205

206

207 **In-house ELISA to determine IgG antibody responses to the SARS-CoV-2 overlapping**  
208 **peptides of the N protein**

209 Ninety-six-well microtitre plates (Thermofisher, USA, Pierce™ Cat: 15031) were coated  
210 with the overlapping peptide representing the different pools and incubated overnight  
211 at 4 °C. The peptides were diluted in bicarbonate/carbonate coating buffer (pH 9.6) and the  
212 final concentration of each peptide was 1 µg/100 µl. The plates were blocked with PBS with  
213 2% (w/v) bovine serum albumin (Sigma Aldrich, Germany, Cat: A7030) and incubated for 2  
214 hours at room temperature and washed before incubation with serum samples diluted 1:500 in  
215 1% BSA. After an incubation of 30 min at room temperature, the plates were washed, and  
216 incubated with biotinylated goat anti-human IgG antibody (Mabtech, Sweden, Cat: 3820-4-  
217 250) diluted 1:1000 in 1% BSA. After a 30-minute incubation at room temperature, the plates  
218 were washed and further incubated with Streptavidin–HRP (Mabtech (Sweden) Cat: 3310-9)  
219 diluted 1:1000 in 1% BSA solution for 30 minutes. After washing the plates, the TMB  
220 ELISA substrate solution (Mabtech, Sweden, Cat: 3652-F10) was added at 100 µl/well and  
221 the plates were incubated in the dark for 10 minutes at room temperature. The reaction was  
222 stopped by adding 2M H<sub>2</sub>SO<sub>4</sub> (Sigma Aldrich, Germany, Cat: 339741) and absorbance values  
223 were read at 450nm. Optic density (OD) values above the mean ± 3SD of the OD values of  
224 the sera from SARS-CoV-2 seronegative individuals was considered as a positive response  
225 for a particular peptide or a pool of peptides.

226

227 **Statistical Analysis**

228 GraphPad Prism version 9 was used for statistical analysis. As the data were not normally  
229 distributed, differences in means were compared using the Mann-Whitney U test (two tailed).  
230 The descriptive statistics including the mean and frequencies were used to compare antibody  
231 responses of individual peptides. Kruskal-Wallis test was used to determine the differences  
232 between the antibody levels (indicated by the OD value) in the four peptide pools (pool 1, 2,  
233 3, and 4). and four immunodominant regions (P5/6, P23/24, P40/41, and P53/54). If Kruskal-  
234 Wallis test was significant, a post hoc test (Dunn test) was done to identify which group or  
235 groups different from others. Spearman's correlation coefficient was used to determine the  
236 correlation between antibody responses against immunodominant regions of N protein and  
237 neutralizing antibodies.

238

239

240

241

242

243

244

245

246

247

248

249

250

251

## 252 **Results**

### 253 **Identification immunodominant regions within the N protein of SARS-CoV-2**

254 We initially tested the four pools of the SARS CoV-2 overlapping peptides of the N protein  
255 in the cohorts A to E. WT, delta, omicron infected and sinopharm vaccinated individual's  
256 antibody responses were significantly different in the four overlapping pools of peptides  
257 (Figure 1A to 1D). The number of individuals included in each of the cohorts that tested  
258 positive for the different pools is shown in table 1. Omicron infected + vaccinated individuals  
259 (who were vaccinated) had the highest positivity rates (>75%) for all four peptide pools.

260

261 Of those in who were infected prior to being vaccinated, the WT infected individuals had the  
262 highest positivity rates for pool 2, while delta infected individuals gave highest antibody  
263 responses to pool 3 and 4. Sinopharm vaccinees had the highest positivity rates for pool 1.  
264 However, Sinopharm vaccinees had overall lower positivity rates and magnitude of responses  
265 for all four peptide pools compared to naturally infected individuals.

266

267 **Table 1: The number of individuals in different cohorts who gave a positive response to**  
268 **different overlapping peptide pools of the N protein**

| SARS-CoV-2 Variant | Number of individuals who gave a positive antibody response |        |        |        |                   |
|--------------------|-------------------------------------------------------------|--------|--------|--------|-------------------|
|                    | Pool 1                                                      | Pool 2 | Pool 3 | Pool 4 | At least one pool |
|                    |                                                             |        |        |        |                   |

|                                |            |           |            |            |                  |
|--------------------------------|------------|-----------|------------|------------|------------------|
| WT (n=30)                      | 9 (30%)    | 15 (50%)  | 2 (6.7%)   | 3 (10%)    | 18/30<br>(60%)   |
| Delta (n=30)                   | 10 (33.3%) | 9 (30%)   | 17 (56.7%) | 16 (53.3%) | 22/30<br>(73.3%) |
| Omicron + vaccinated<br>(n=20) | 16 (80%)   | 15 (75%)  | 18 (90%)   | 16 (80%)   | 18/20<br>(90%)   |
| Sinopharm (n=30)               | 11 (36.7%) | 7 (23.3%) | 5 (16.7%)  | 4 (13.3%)  | 14/30<br>(46.7%) |

269

270 **Mapping of antibody responses in the different cohorts to identify immunodominant**  
 271 **regions of N protein**

272 As the WT infected individuals (cohort B) had the highest responses to pool 2, Sinopharm  
 273 vaccinees (cohort E) to pool 1, delta infected individuals (cohort C) to pool 3 and 4, we  
 274 proceeded to map the immunodominant regions within these different pools of overlapping  
 275 peptides, by testing antibody responses to these individual peptides separately.

276

277 In cohort D and E, the highest responses were observed for the two overlapping peptides 5  
 278 and 6 of pool 1 (peptides 1 to 15) (Supplementary Figure 1A and 1B). Cohort B (WT infected  
 279 individuals) and D (omicron infected+ vaccinated) had the highest responses to overlapping  
 280 peptides 23 and 24 of pool 2 (Peptide 16 to 30) (Supplementary Figure 1C and 1D).  
 281 Individuals from cohort C (delta infected) and D, had the highest responses to overlapping  
 282 peptide 40 and 41 of pool 3 (Peptide 31 to 45) (Supplementary Figure 1E 1F). In cohort C  
 283 and D, the highest responses were observed for peptide 53 and peptide 54 of pool 4 (Peptide  
 284 46 to 59) (Supplementary Figure 1G and 1H). Based on these results, overlapping peptides 5

285 and 6 of pool 1, overlapping peptides 23 and 24 of pool 2, overlapping peptides 40 and 41 of  
286 pool 3 and overlapping peptides 53 and 54 of pool 4, were the immunodominant regions  
287 within the N protein.

288

## 289 **Characterizing antibody responses to the immunodominant regions identified within N** 290 **protein**

291 In order to further characterize the antibody responses to the above immunodominant regions  
292 within the N protein, the overlapping peptides 5 and 6, 23 and 24, 40 and 41 and 53 and 54  
293 were pooled together from four different pools. The antibody responses for these regions  
294 were assessed in all cohort (cohort A to E), to identify responses in all individuals for these  
295 pools. Although the WT infected individuals gave the highest antibody responses to P23/24  
296 (Figure 2A and B), there was no significant difference ( $p=0.057$ ) in the magnitude of  
297 responses for the four immunodominant peptide pools in this group. Similarly, delta infected  
298 individuals had a similar magnitude of responses for the four pools ( $p=0.53$ ). Omicron  
299 infected+vaccinated (cohort D) had the highest responses to P40/41 and P53/54, while  
300 Sinopharm vaccinees had the highest responses to P5/6 (Figure 2A and B).

301

302 The positivity rates for each of the four immunodominant regions in these cohorts is shown in  
303 table 2. Overall, all cohorts had >80% positivity rates for all 4 regions, except lower  
304 positivity rates in delta infected and omicron infected+ vaccinated individuals for P23/24  
305 region. In contrast, all WT infected individuals gave a positive response for this region, while  
306 they had low positivity rates (66.7%) for P53/54.

307

308 We also assessed specificity of the antibody responses to the four immunodominant regions  
 309 of the N protein (P5/6, P23/24, P40/41, and P53/54), by investigating responses in those who  
 310 received COVID-19 vaccines with only the spike protein. Accordingly, responses were  
 311 assessed in those who received AZD1222 (ChAdOx1) (n=10), Moderna (mRNA-1273)  
 312 (n=10), and Sputnik V (Gam-COVID-Vac) (n=10). None of the SARS-CoV-2 seronegative  
 313 individuals (cohort A) or those who received ChAdOx1, Gam-COVID-Vac or mRNA-1273  
 314 responded to the peptides P53/54, while one individual (1/30) had a positive response to the  
 315 peptides P5/6. Two individuals (2/30) responded to the peptides P23/24 and P40/41 (Table 2,  
 316 Figure 2C). Therefore, while the specificity of peptide P53/54 was 100% in detecting SARS-  
 317 CoV-2 N protein specific responses following or vaccination (whole virus vaccine) or  
 318 infection, the specificity of peptides P5/6 was 96.7% while for peptides P23/24 and P40/41 it  
 319 was 93.3%.

320

321 **Table 2: The number of individuals in different cohorts who gave a positive response to**  
 322 **immunodominant regions within the N protein**

| SARS-CoV-2 Variant         | Number of individuals who gave a positive antibody response |            |            |            |                       |
|----------------------------|-------------------------------------------------------------|------------|------------|------------|-----------------------|
|                            | P5/6                                                        | P23/24     | P40/41     | P53/54     | At least for one pair |
| WT (n=12)                  | 10 (83.3%)                                                  | 12 (100%)  | 11 (91.7%) | 8 (66.7%)  | 12/12<br>(100%)       |
| Delta (n=12)               | 11 (91.7%)                                                  | 9 (75%)    | 11 (91.7%) | 10 (83.3%) | 12/12<br>(100%)       |
| Omicron+ vaccinated (n=22) | 20 (90.9%)                                                  | 16 (72.7%) | 20 (90.9%) | 18 (81.8%) | 20/22<br>(90.9%)      |

|                    |            |            |            |            |                  |
|--------------------|------------|------------|------------|------------|------------------|
| Sinopharm (n=12)   | 12 (100%)  | 11 (91.7%) | 11 (91.7%) | 11 (91.7%) | 12/12(100%)      |
| Total (n=58)       | 53 (91.4%) | 48 (82.8%) | 53 (91.4%) | 47 (81.0%) | 56/58<br>(96.5%) |
|                    |            |            |            |            |                  |
| AstraZeneca (n=10) | 0          | 1 (10%)    | 1 (10%)    | 0          | 1/10 (10%)       |
| Sputnik V (n=10)   | 0          | 0          | 1 (10%)    | 0          | 1/10 (10%)       |
| Moderna (n=10)     | 1 (10%)    | 1 (10%)    | 0          | 0          | 2/10 (20%)       |
| Total (n=30)       | 1 (3.3%)   | 2 (6.7%)   | 2 (6.7%)   | 0          | 4/30 (13.3%)     |

323 **Conservation of immunodominant regions of the N protein of SARS-CoV-2 with**  
 324 **seasonal human coronavirus and SARS-CoV-2 variants of concern (VoC)**

325 As the consensus peptide sequence may not be representative of the infecting subtype, we  
 326 determined the conservation within these four immunodominant regions within the different  
 327 SARS-CoV-2 variants (Alpha, QVX37034.1; Beta, QWW93444.1; Gamma, QXF23757.1;  
 328 Delta, UKA47847.1; Omicron, (BA.1 (SriLanka/aicbu4450/2022), BA.2  
 329 (SriLanka/aicbu4463/2022) and BA.5 (USA/CA-CDPH-FS27225444/2022) and also the  
 330 cross reactivity with other seasonal human coronaviruses (OC43, QBP84763.1; HKU1,  
 331 ABG77571.1; NL63, YP\_003771.1). We used Jalview software [28] and tools available at  
 332 European Bioinformatics Institute (EBI) ([www.ebi.ac.uk](http://www.ebi.ac.uk), 22 March 2022) to determine  
 333 conservation between identified four immunodominant regions of the wild type SARS-CoV-2  
 334 (YP\_009724397.2) The four regions in which the conservation and cross reactivity were  
 335 assessed are as follows;

336 P5/P6: <sup>29</sup>NGERSGARSKQRRPQGLPNNTASW<sup>52</sup>

337 P23/P24:<sup>155</sup>AAIVLQLPQGTTLPKGFYAEGSRG<sup>178</sup>

338 P40/P41:<sup>274</sup>FGRRGPEQTQGNFGDQELIRQGTG<sup>297</sup>)



339 P53/54: <sup>365</sup>PTEPKKDKKKKADETQALPQRQKK<sup>388</sup>

340 All regions showed <50% sequence identity with the three seasonal human coronaviruses  
341 (Supplementary table 1 Figure 3A to 3D). P5/6 showed <20% sequence identity with OC43,  
342 HKU1, and NL63, with P53/54 showing <10% sequence identity with these viruses  
343 (Supplementary table 1). In contrast, the regions P23/24 and P40/41 showed >45% of  
344 sequence identity with OC43 and HKU1 but not with NL63. All four immunodominant  
345 regions were found to be conserved in both alpha and beta variants (Supplementary table 1  
346 and Figure 3E to H), while there was 95.8% sequence identity with delta (single amino acid  
347 replacement) in the P53/54 region and 95.8% in the P40/41 region with the gamma variant  
348 (single amino acid replacement). All three omicron sub-lineages (BA.1, BA.2 and BA.5) P5/6  
349 have a 3 amino acid deletion within the regions represented by P5/6 and therefore, a sequence  
350 identity of 87.5% (Figure 3E). P23/24 regions was 100% conserved in all five VoC (Figure  
351 3F).

352

353 As the SARS-CoV-2 virus continues to further evolve and due to the future threat of other bat  
354 coronaviruses spilling over and causing future pandemics, many Pan-Sarbecovirus vaccines  
355 are currently under development [9,19]. Therefore, we proceeded to find out the conservation  
356 of these four regions with 4 bat coronaviruses, RS4081, WIV1, RatG13 and Rf1 (Figure 4)  
357 and Supplementary table 1. These four regions showed >91% sequence identity with all the  
358 four bat coronaviruses.

359

360 **Antibody responses to the four immunodominant regions in patients with varying**  
361 **severity of COVID-19 due to the WT virus**

362 We then sought to compare antibody responses between mild and severe disease during early  
363 and late stage of the infection in individuals who had mild illness (n=16) or severe illness  
364 (n=9) during acute stage (<7 days since onset of symptoms) and during late infection (21 to  
365 28 days since onset of symptoms). Those with severe illness had significantly higher antibody  
366 responses to P23/24, P40/41 and P53/54 during the first week of illness compared to those  
367 with mild illness (Figure 5A). During late infection, those with severe disease had  
368 significantly higher antibody responses to all four regions than individuals with mild illness  
369 (Figure 5B).

370

371 We then sought to explore if antibody responses to these immunodominant regions, correlate  
372 with neutralizing antibody (Nab) responses, by comparing ACE2 blocking antibodies (which  
373 were shown to correlate with Nabs), by using a surrogate SARS-CoV-2-neutralizing antibody  
374 assay. The ACE2 blocking antibodies did not correlate with antibody response against all  
375 four regions (Spearman's  $r=0.17$ ,  $p=0.02$ ) (Figure 5C).

376

377

378

379

380

381

382

383

384

385

386

## 387 **Discussion**

388 In this study we have identified four immunodominant regions within the N protein, which  
389 gave a high frequency of responses in those infected with the WT virus, delta, omicron and  
390 those vaccinated with Sinopharm. Overall, >80% of individuals gave responses above the  
391 positive cut-off threshold to many of the four regions, with some differences with individuals  
392 who were infected with different VoCs. These regions were found to be 100% specific, as  
393 none of the seronegative individuals gave any responses. However, 6.7% to 10% of  
394 individuals who had received the spike proteins vaccines and therefore, should not have  
395 responses to these regions also responded. Although they had tested negative for infection  
396 with SARS-CoV-2 by the commercial N protein-specific antibody assay, it is possible that  
397 they could still have been naturally infected. Due to the high sensitivity and specificity of  
398 these regions, they have a potential to be used to identify N protein specific antibody  
399 responses, especially regions aa 29 to 52 (P5/6) and aa 365 to 388 (P40/41), for which >90%  
400 of individuals responded to. However, as we used overlapping peptides to identify potential  
401 epitopes, we are likely to have missed conformational epitopes which could be key antibody  
402 recognition sites.

403

404 The five domains of the N protein have shown to bind to RNA and carry out multiple  
405 functions including RNA interference, regulating virus replication and host immune evasion  
406 [6]. Of the four regions identified here, one is within the N terminal domain (aa 29-52, P5/6),

407 one in the RNA binding domain (aa 155-178, P23/24), one within the dimerization domain  
408 (aa 274 to 297, P40/41) and one in the C-terminal domain (aa365 to 388/ P53/54). Some  
409 previous studies had identified immunodominant regions of the N protein, in llamas  
410 (domesticated South American camel), and had identified antibodies that bind to highly  
411 conserved regions within the N protein [32]. One of these antibodies had shown to bind to the  
412 C-terminal domain (aa 49-174) and two antibodies to the N-terminal domain (aa 247-364 and  
413 aa 365-419)[32]. The four immunodominant regions that were identified here, also fall within  
414 these three regions. Another study, which screened for B cell epitopes within the N protein  
415 using mouse models, identified aa 401 to 408 as the main antibody target. Our data show that,  
416 the predominant B cell epitopes identified within the N protein differs based on the infecting  
417 SARS-CoV-2 variant. For instance, those who were infected with the WT virus,  
418 predominantly recognized the aa155 to 178 regions (P23/24), whereas those who were  
419 infected with delta had the highest responses to the aa 29 to 52 and aa 274 to 294 regions.  
420 However, the responses to these overlapping peptides were assessed using the sequence of a  
421 Wuhan virus strain isolated from USA in 2020 and the epitope recognition could be different,  
422 based on the sequence of peptides used. In those who were infected with different omicron  
423 sub-lineages (BA.1 and BA.2) also had the highest responses to the aa 29 to 52 and aa 274 to  
424 294 regions. Therefore, the predominant B cell epitope recognition, appears to differ based on  
425 the variant of infection. Although Sinopharm vaccinees responded to all four regions, the  
426 magnitude of the responses was significantly lower than following natural infection. This is  
427 possibly due to natural infection inducing more robust responses to the N protein than  
428 following inactivated vaccines containing the whole protein.

429

430 The mortality rates and hospitalization rates have varied widely throughout the COVID-19  
431 pandemic in different countries, with many countries in Europe, and United States reporting

432 higher mortality rates and hospitalization rates than some countries in Africa and Asia,  
433 despite higher rates of vaccination [13,14]. These differences could be attributed to reporting  
434 of COVID-19 deaths and limitations in testing, as many countries in sub-Saharan Africa have  
435 reported high excess mortality rates [10]. Sri Lanka experienced high mortality rates during  
436 the delta outbreak during the months from June to October 2021 prior to vaccination [24].  
437 However, mortality rates have been significantly less (0.85/ million individuals in Sri Lanka)  
438 during the massive omicron wave (BA.2), than many European countries and the United  
439 States (mortality rates 4.03/million individuals in Europe and 5.4/million individuals in  
440 United States) [13]. Only 18% of Sri Lankans had received an mRNA booster dose, when the  
441 omicron variant was rapidly spreading in Sri Lanka [14]. The lower mortality rates seen in Sri  
442 Lanka during the omicron outbreak were unlikely to be due to under reporting or limited  
443 testing as the excess mortality rates in Sri Lanka were found to be less than the excess  
444 mortality rates reported in Europe and North America [10]. Sinopharm/BBIBP-CorV was the  
445 most widely used vaccine, in Sri Lanka with 12 million (70.6%) individuals receiving this  
446 vaccine by end of December 2021 [9]. Sinopharm/BBIBP-CorV vaccine was found to be less  
447 immunogenic than the mRNA-1273, AZD1222 and Sputnik V, 3 months post second dose, in  
448 a head-to-head comparison in the Sri Lankan population, based on ACE2 blocking antibodies  
449 and antibodies to the receptor binding domain of the spike protein [15]. However, as  
450 Sinopharm/BBIBP-CorV is an inactivated vaccine, it did induce T cell and antibody  
451 responses to the N protein [16]. In addition, although the N protein was thought to be  
452 localized to the cytosol, it was recently shown that this protein was expressed on the surface  
453 of infected cells [20]. As the N protein has shown to bind to several different types of  
454 chemokines, antibodies against the N protein could also inhibit chemotaxis of leucocytes  
455 [20]. Furthermore, antibodies bound to N protein were shown to activate FcR expressing  
456 innate immune cells, further contributing to the phagocytosis and apoptosis of infected

457 cells[20]. Although there could be many reasons for the differences in mortality rates for  
458 different variants, it is possible that antibody responses to the N protein, offered additional  
459 protection in Sinopharm vaccinees, which should be further investigated.

460

461 Due to the rapidly evolving nature of SARS-CoV-2 and emergence of more immune evasive  
462 omicron sub-lineages, there is a global effort to develop a pan-Sarbecovirus vaccine [7,9,11].  
463 However, many pan-Sarbecovirus vaccines only use the spike protein as the immunogen and  
464 explore the immune responses to the spike protein [19,25], while only a few vaccines also  
465 include the N protein [9]. In this study we show that the four immunodominant regions  
466 identified here, were highly conserved regions within SARS-CoV-2 and the bat  
467 coronaviruses. Although the neutralizing antibody responses for many bat Sarbecoviruses has  
468 been investigated [27], there are no data if antibodies targeting the main B cell epitopes  
469 within the N protein, also cross-neutralize the most frequent bat Sarbecoviruses, which would  
470 be important. While vaccination, especially with an mRNA booster dose induced high levels  
471 of Nabs and protected individuals from severe disease [4], natural infection and vaccination  
472 induced a high magnitude of durable immune responses [2]. In fact, it was shown that two  
473 doses of an mRNA vaccine and natural infection gave similar immune responses as three  
474 doses of a mRNA vaccine, while the immune responses induced by natural infection were  
475 longer lasting [2]. Therefore, in order to induce persistent and broad immune responses,  
476 antibody and T cell responses to the N protein may play an important role in addition to  
477 Nabs.

478

479 **Conclusions**

480 We have identified four immunodominant regions within the N protein of SARS-CoV-2,  
481 which are highly conserved in the SARS-CoV-2 variants and also show high conservation in  
482 bat Sarbecoviruses. Responses to these regions were highly specific and elicited responses in  
483 > 90% of naturally infected individuals or those who received a whole virus inactivated  
484 vaccine to at least two of the regions. As these regions were highly specific with high  
485 sensitivity, they have a potential to be used to develop diagnostic assays and to be used in  
486 development of vaccines.

487

#### 488 **List of abbreviations**

489 Nabs: Neutralization antibodies

490 N protein: Nucleocapsid protein

491 VoC: variants of concern

492 sVNT: surrogate virus neutralizing test

493 RBD: receptor binding domain

494 WT: Wuhan strain of SARS-CoV-2

#### 495 **Ethics approval and consent to participate**

496 Ethics approval was obtained by the Ethics Review Committee of the University of Sri

497 Jayewardenepura. All individuals gave informed, written consent.

#### 498 **Consent for publication**

499 Not applicable

#### 500 **Availability of data and materials**

501 All data is available in the manuscript and figures.

502 **Competing interests**

503 Authors have no competing interests.

504

505 **Funding**

506 We are grateful to Allergy Immunology and Cell Biology Unit, University of Sri  
507 Jayewardenepura, the NIH, USA (grant number 5U01AI151788-02), World bank, Sri Lanka  
508 Covid 19 Emergency Response and Health Systems Preparedness Project (ERHSP)  
509 of Ministry of Health Sri Lanka funded by World Bank and the UK Medical Research  
510 Council for funding.

511 **Authors' contributions**

512 Conceptualization of the study: PDP, CJ, GNM

513 Data curation: ISA, TN, JJ, TR, HK, SD

514 Project administration: CJ, AW, GNM

515 Experiments: PDP, FB, DM, LP

516 Data analysis: PDP

517 Funding: CJ, GSO, GNM

518 Writing the manuscript: PDP, GNM

519 Reviewing the manuscript: CJ, GSO



520

521 **Acknowledgements**

522 None

523

524 **References**

- 525 1. Addetia A., Crawford K.H.D., Dingens A., Zhu H., Roychoudhury P., Huang M.L.,  
526 Jerome K.R., Bloom J.D. and Greninger A.L. Neutralizing Antibodies Correlate with  
527 Protection from SARS-CoV-2 in Humans during a Fishery Vessel Outbreak with a  
528 High Attack Rate. *Journal of clinical microbiology* 58(11), 2020.
- 529 2. Altarawneh H.N., Chemaitelly H., Ayoub H.H., Tang P., Hasan M.R., Yassine H.M.,  
530 Al-Khatib H.A., Smatti M.K., Coyle P., Al-Kanaani Z., Al-Kuwari E., Jeremijenko  
531 A., Kaleeckal A.H., Latif A.N., Shaik R.M., Abdul-Rahim H.F., Nasrallah G.K., Al-  
532 Kuwari M.G., Butt A.A., Al-Romaihi H.E., Al-Thani M.H., Al-Khal A., Bertollini R.  
533 and Abu-Raddad L.J. Effects of Previous Infection and Vaccination on Symptomatic  
534 Omicron Infections. *The New England journal of medicine*, 2022.
- 535 3. Bai Z., Cao Y., Liu W. and Li J. The SARS-CoV-2 Nucleocapsid Protein and Its Role  
536 in Viral Structure, Biological Functions, and a Potential Target for Drug or Vaccine  
537 Mitigation. *Viruses* 13(6), 2021.
- 538 4. Barda N., Dagan N., Cohen C., Hernan M.A., Lipsitch M., Kohane I.S., Reis B.Y. and  
539 Balicer R.D. Effectiveness of a third dose of the BNT162b2 mRNA COVID-19  
540 vaccine for preventing severe outcomes in Israel: an observational study. *Lancet*  
541 398(10316):2093-2100, 2021.
- 542 5. Bechman K., Yates M., Mann K., Nagra D., Smith L.J., Rutherford A.I., Patel A.,  
543 Periselneris J., Walder D., Dobson R.J.B., Kraljevic Z., Teo J.H.T., Bernal W., Barker

- 544 R., Galloway J.B. and Norton S. Inpatient COVID-19 mortality has reduced over  
545 time: Results from an observational cohort. *PloS one* 17(1):e0261142, 2022.
- 546 6. Burbelo P.D., Riedo F.X., Morishima C., Rawlings S., Smith D., Das S., Strich J.R.,  
547 Chertow D.S., Davey R.T. and Cohen J.I. Sensitivity in Detection of Antibodies to  
548 Nucleocapsid and Spike Proteins of Severe Acute Respiratory Syndrome Coronavirus  
549 2 in Patients With Coronavirus Disease 2019. *The Journal of infectious diseases*  
550 222(2):206-213, 2020.
- 551 7. Cao Y., Yisimayi A., Jian F., Song W., Xiao T., Wang L., Du S., Wang J., Li Q.,  
552 Chen X., Yu Y., Wang P., Zhang Z., Liu P., An R., Hao X., Wang Y., Wang J., Feng  
553 R., Sun H., Zhao L., Zhang W., Zhao D., Zheng J., Yu L., Li C., Zhang N., Wang R.,  
554 Niu X., Yang S., Song X., Chai Y., Hu Y., Shi Y., Zheng L., Li Z., Gu Q., Shao F.,  
555 Huang W., Jin R., Shen Z., Wang Y., Wang X., Xiao J. and Xie X.S. BA.2.12.1, BA.4  
556 and BA.5 escape antibodies elicited by Omicron infection. *Nature*, 2022.
- 557 8. Chansaenroj J., Yorsaeng R., Posuwan N., Puenpa J., Wanlapakorn N., Sudhinaraset  
558 N., Sripramote M., Chalongsriyalert P., Jirajariyavej S., Kiatpanabhikul P., Saiyarin  
559 J., Soudon C., Thienfaidee O., Palakawong Na Ayuthaya T., Brukesawan C.,  
560 Chirathaworn C., Intharasongkroh D., Chaiwanichsiri D., Issarasongkhram M.,  
561 Kitphati R., Mungaomklang A., Nagavajara P. and Poovorawan Y. Long-term  
562 specific IgG response to SARS-CoV-2 nucleocapsid protein in recovered COVID-19  
563 patients. *Sci Rep* 11(1):23216, 2021.
- 564 9. Coleon S., Wiedemann A., Surenaud M., Lacabaratz C., Hue S., Prague M.,  
565 Cervantes-Gonzalez M., Wang Z., Ellis J., Sansoni A., Pierini C., Bardin Q., Fabregue  
566 M., Sharkaoui S., Hoest P., Dupaty L., Picard F., El Hajj M., Centlivre M., Ghosn J.,  
567 French C.C.S.G., Thiebaut R., Cardinaud S., Malissen B., Zurawski G., Zarubica A.,

- 568 Zurawski S.M., Godot V. and Levy Y. Design, immunogenicity, and efficacy of a  
569 pan-sarbecovirus dendritic-cell targeting vaccine. *EBioMedicine* 80:104062, 2022.
- 570 10. Collaborators C.-E.M. Estimating excess mortality due to the COVID-19 pandemic: a  
571 systematic analysis of COVID-19-related mortality, 2020-21. *Lancet*  
572 399(10334):1513-1536, 2022.
- 573 11. Fountain-Jones N.M., Appaw R.C., Carver S., Didelot X., Volz E. and Charleston M.  
574 Emerging phylogenetic structure of the SARS-CoV-2 pandemic. *Virus Evol*  
575 6(2):veaa082, 2020.
- 576 12. Garcia-Beltran W.F., Lam E.C., Astudillo M.G., Yang D., Miller T.E., Feldman J.,  
577 Hauser B.M., Caradonna T.M., Clayton K.L., Nitido A.D., Murali M.R., Alter G.,  
578 Charles R.C., Dighe A., Branda J.A., Lennerz J.K., Lingwood D., Schmidt A.G.,  
579 Iafrate A.J. and Balazs A.B. COVID-19-neutralizing antibodies predict disease  
580 severity and survival. *Cell* 184(2):476-488 e411, 2021.
- 581 13. Hannah Ritchie E.M., Lucas Rodés-Guirao, Cameron Appel, Charlie Giattino,  
582 Esteban Ortiz-Ospina, Joe Hasell, Bobbie Macdonald, Diana Beltekian and Max  
583 Roser (2020). *Coronavirus Pandemic (COVID-19)*. 02/24/2022 ed, 2022.
- 584 14. Hannah Ritchie E.O.-O., Diana Beltekian, Edouard Mathieu, Joe Hasell, Bobbie  
585 Macdonald, Charlie Giattino, Cameron Appel and Max Roser. 2021. *Coronavirus*  
586 *(COVID-19) Vaccinations*. In *COVID-19 vaccine doses administered per 100 people*,  
587 Apr 1, 2021 Our World in Data <<https://ourworldindata.org/covid-vaccinations>>.  
588 Accessed
- 589 15. Jeewandara C., Aberathna I.S., Danasekara S., Gomes L., Fernando S., Guruge D.,  
590 Ranasinghe T., Gunasekera B., Kamaladasa A., Kuruppu H., Somathilake G.,  
591 Jayamali J., Jayathilaka D., Wijayatilake H.D.K., Pushpakumara P.D., Harvie M.,  
592 Nimasha T., de Silva S.D.G., Wijayamuni R., Schimanski L., Rijal P., Tan J.,

- 593 Townsend A., Ogg G.S. and Malavige G.N. Comparison of the Immunogenicity of  
594 five COVID-19 vaccines in Sri Lanka. *Immunology*, 2022.
- 595 16. Jeewandara C., Aberathna I.S., Pushpakumara P.D., Kamaladasa A., Guruge D.,  
596 Wijesinghe A., Gunasekera B., Tanussiya S., Kuruppu H., Ranasinghe T., Dayarathne  
597 S., Dissanayake O., Gamalath N., Ekanayake D., Mpdj J., Jayathilaka D.,  
598 Dissanayake M., Madusanka D., Jayadas T.T., Mudunkotuwa A., Somathilake G.,  
599 Harvie M., Nimasha T., Danasekara S., Wijayamuni R., Schimanski L., Rijal P., Tan  
600 T.K., Dong T., Townsend A., Ogg G.S. and Malavige G.N. Immune responses to  
601 Sinopharm/BBIBP-CorV in individuals in Sri Lanka. *Immunology*, 2022.
- 602 17. Jeewandara C., Guruge D., Jayathilaka D., Deshan Madhusanka P.A., Pushpakumara  
603 P.D., Tanussiya Ramu S., Sepali Aberathna I., Saubhagya Rasikangani Danasekara  
604 D.R., Pathmanathan T., Gunatilaka B., Malavige S., Dias Y., Wijayamuni R., Ogg  
605 G.S. and Malavige G.N. Transmission dynamics, clinical characteristics and sero-  
606 surveillance in the COVID-19 outbreak in a population dense area of Colombo, Sri  
607 Lanka April- May 2020. *PloS one* 16(11):e0257548, 2021.
- 608 18. Kifer D., Bugada D., Villar-Garcia J., Gudelj I., Menni C., Sudre C., Vuckovic F.,  
609 Ugrina I., Lorini L.F., Posso M., Bettinelli S., Ughi N., Maloberti A., Epis O.,  
610 Giannattasio C., Rossetti C., Kalogjera L., Persec J., Ollivere L., Ollivere B.J., Yan  
611 H., Cai T., Aithal G.P., Steves C.J., Kantele A., Kajova M., Vapalahti O., Sajantila A.,  
612 Wojtowicz R., Wierzbza W., Krol Z., Zaczynski A., Zycinska K., Postula M., Luksic  
613 I., Civljak R., Markotic A., Brachmann J., Markl A., Mahnkopf C., Murray B.,  
614 Ourselin S., Valdes A.M., Horcajada J.P., Castells X., Pascual J., Allegri M.,  
615 Primorac D., Spector T.D., Barrios C. and Lauc G. Effects of Environmental Factors  
616 on Severity and Mortality of COVID-19. *Front Med (Lausanne)* 7:607786, 2020.

- 617 19. Liu Z., Chan J.F., Zhou J., Wang M., Wang Q., Zhang G., Xu W., Chik K.K., Zhang  
618 Y., Wang Y., Yuen K.Y., Lu L. and Jiang S. A pan-sarbecovirus vaccine induces  
619 highly potent and durable neutralizing antibody responses in non-human primates  
620 against SARS-CoV-2 Omicron variant. *Cell research* 32(5):495-497, 2022.
- 621 20. Lopez-Munoz A.D., Kosik I., Holly J. and Yewdell J.W. Cell surface SARS-CoV-2  
622 nucleocapsid protein modulates innate and adaptive immunity. *Sci Adv*  
623 8(31):eabp9770, 2022.
- 624 21. Markov P.V., Katzourakis A. and Stilianakis N.I. Antigenic evolution will lead to new  
625 SARS-CoV-2 variants with unpredictable severity. *Nature reviews*, 2022.
- 626 22. Peng Y., Felce S.L., Dong D., Penkava F., Mentzer A.J., Yao X., Liu G., Yin Z., Chen  
627 J.L., Lu Y., Wellington D., Wing P.A.C., Dominey-Foy D.C.C., Jin C., Wang W.,  
628 Hamid M.A., Fernandes R.A., Wang B., Fries A., Zhuang X., Ashley N., Rostron T.,  
629 Waugh C., Sopp P., Hublitz P., Beveridge R., Tan T.K., Dold C., Kwok A.J., Rich-  
630 Griffin C., Dejnirattisa W., Liu C., Kurupati P., Nassiri I., Watson R.A., Tong O.,  
631 Taylor C.A., Kumar Sharma P., Sun B., Curion F., Revale S., Garner L.C., Jansen K.,  
632 Ferreira R.C., Attar M., Fry J.W., Russell R.A., Consortium C., Stauss H.J., James  
633 W., Townsend A., Ho L.P., Klenerman P., Mongkolsapaya J., Screaton G.R.,  
634 Dendrou C., Sansom S.N., Bashford-Rogers R., Chain B., Smith G.L., McKeating  
635 J.A., Fairfax B.P., Bowness P., McMichael A.J., Ogg G., Knight J.C. and Dong T. An  
636 immunodominant NP105-113-B\*07:02 cytotoxic T cell response controls viral  
637 replication and is associated with less severe COVID-19 disease. *Nature immunology*  
638 23(1):50-61, 2022.
- 639 23. Ranasinghe D., Jayadas T.T.P., Jayathilaka D., Jeewandara C., Dissanayake O.,  
640 Guruge D., Ariyaratne D., Gunasinghe D., Gomes L., Wijesinghe A., Wijayamuni R.  
641 and Malavige G.N. Comparison of different sequencing techniques for identification

- 642 of SARS-CoV-2 variants of concern with multiplex real-time PCR. *PloS one*  
643 17(4):e0265220, 2022.
- 644 24. Ranasinghe D., Jayathilaka D., Jeewandara C., Gunasinghe D., Ariyaratne D., Jayadas  
645 T.T.P., Kuruppu H., Wijesinghe A., Bary F.F., Madhusanka D., Pushpakumara P.D.,  
646 Guruge D., Wijayamuni R., Ogg G.S. and Malavige G.N. Molecular Epidemiology of  
647 AY.28 and AY.104 Delta Sub-lineages in Sri Lanka. *Front Public Health* 10:873633,  
648 2022.
- 649 25. Su S., Li W. and Jiang S. Developing pan-beta-coronavirus vaccines against emerging  
650 SARS-CoV-2 variants of concern. *Trends in immunology* 43(3):170-172, 2022.
- 651 26. Tan C.W., Chia W.N., Qin X., Liu P., Chen M.I., Tiu C., Hu Z., Chen V.C., Young  
652 B.E., Sia W.R., Tan Y.J., Foo R., Yi Y., Lye D.C., Anderson D.E. and Wang L.F. A  
653 SARS-CoV-2 surrogate virus neutralization test based on antibody-mediated blockage  
654 of ACE2-spike protein-protein interaction. *Nature biotechnology* 38(9):1073-1078,  
655 2020.
- 656 27. Tan C.W., Chia W.N., Young B.E., Zhu F., Lim B.L., Sia W.R., Thein T.L., Chen  
657 M.I., Leo Y.S., Lye D.C. and Wang L.F. Pan-Sarbecovirus Neutralizing Antibodies in  
658 BNT162b2-Immunized SARS-CoV-1 Survivors. *The New England journal of*  
659 *medicine* 385(15):1401-1406, 2021.
- 660 28. Waterhouse A.M., Procter J.B., Martin D.M., Clamp M. and Barton G.J. Jalview  
661 Version 2--a multiple sequence alignment editor and analysis workbench.  
662 *Bioinformatics* 25(9):1189-1191, 2009.
- 663 29. Watson O.J., Barnsley G., Toor J., Hogan A.B., Winskill P. and Ghani A.C. Global  
664 impact of the first year of COVID-19 vaccination: a mathematical modelling study.  
665 *The Lancet infectious diseases*, 2022.

- 666 30. Whitaker M., Elliott J., Bodinier B., Barclay W., Ward H., Cooke G., Donnelly C.A.,  
667 Chadeau-Hyam M. and Elliott P. Variant-specific symptoms of COVID-19 among  
668 1,542,510 people in England. medRxiv:2022.2005.2021.22275368, 2022.
- 669 31. WHO. Clinical management of severe acute respiratory infection when novel  
670 coronavirus (2019-nCoV) infection is suspected: interim guidance: WHO; 2020 28th  
671 January 2020.
- 672 32. Ye Q., Lu S. and Corbett K.D. Structural Basis for SARS-CoV-2 Nucleocapsid  
673 Protein Recognition by Single-Domain Antibodies. *Frontiers in immunology*  
674 12:719037, 2021.
- 675
- 676
- 677
- 678
- 679
- 680
- 681
- 682
- 683
- 684
- 685
- 686
- 687

688

689

## 690 **Figure legends**

### 691 **Figure 1: Antibody responses for the four overlapping pools of peptide of the N protein** 692 **of SARS-CoV-2**

693 IgG antibody responses were measured by an in-house ELISA for pool 1 (A), pool 2 (B),  
694 pool 3 (C) and pool 4 (D) containing overlapping peptides of the N protein in SARS-CoV-2  
695 seronegative (non-vaccinated) individuals (n=30), WT infected individuals (n=30), delta  
696 infected individuals (n=30), omicron infected and vaccinated individuals (n=20), and  
697 Sinopharm vaccinees (n=30). Kruskal-Wallis test was used to determine the differences  
698 between the levels of antibody responses in four peptide pools (pool 1, 2, 3, and 4). Dotted  
699 line shows the cutoff value (OD value) of a positive response for the each of the peptide  
700 pools. The error bars indicate the median and the interquartile ranges. Black: seronegatives ;  
701 Brown: WT infected individuals ; Blue: Delta infected individuals ; Green: Omicron +  
702 vaccinated; Red: Sinopharm vaccinees.

703

### 704 **Figure 2: Characterizing antibody responses to the immunodominant regions identified** 705 **within N protein**

706 IgG antibody responses to the four immunodominant regions (P5/6, P23/24, P40/41, and  
707 P53/54) in the N protein were measured by an in-house ELISA in SARS-CoV-2 in SARS-  
708 CoV-2 seronegative (non-vaccinated) individuals (n=15), WT infected individuals (n=12),  
709 delta infected individuals (n=12), omicron infected and vaccinated individuals (n=22), and  
710 Sinopharm vaccinees (n=12) (A). The magnitude of antibody responses to these regions in



711 the above cohorts were compared with each other (B). In order to determine specificity,  
712 antibody responses were measured in individuals who were vaccinated (uninfected) with  
713 AZD1222 (n=10), Moderna (n=10), and Sputnik V (n=10). Kruskal-Wallis test was used to  
714 determine the differences between the levels of antibody responses in four peptide pools  
715 (pool 1, 2, 3, and 4). The error bars indicate the median and the interquartile ranges.

716

717 **Figure 3: Analysis of conservation of immunodominant regions of the N protein of**  
718 **SARS-CoV-2 with seasonal human coronavirus and SARS-CoV-2 variants of concern**  
719 **(VoC)**

720 The cross reactivity of the four immunodominant regions P5/6 (A), P23/24 (B), P40/41 (C),  
721 and P53/54 (D) with three seasonal human corona viruses (OC43, HKU1, and NL63) were  
722 determined The conservation within these four immunodominant regions were also assessed  
723 for the five VoCs (alpha, beta, gamma, delta, and omicron (BA.1, BA.2, and BA.5). P5/6 (E),  
724 P23/24 (F), P40/41 (G), and P53/54 (H). Matching (sequence identity 100%) respective  
725 immunodominant regions were highlighted purple color.

726

727 **Figure 4: Analysis of conservation of immunodominant regions of the N protein of**  
728 **SARS-CoV-2 with bat coronaviruses**

729 The cross reactivity of the four immunodominant regions P5/6 (A), P23/24 (B), P40/41 (C),  
730 and P53/54 (D) RS4081, WIV1, RatG13 and Rf1 were analyzed. Matching (sequence identity  
731 100%) respective immunodominant regions were highlighted purple color.

732

733 **Figure 5: Antibody responses to the four immunodominant regions in patients with**  
734 **varying severity of COVID-19 due to the WT virus**

735 Antibody responses to the four immunodominant regions were measured by an in-house  
736 ELISA, in patients infected with the WT of SARS-CoV-2 with mild (n=16) and severe  
737 disease (n=9) during early illness (<7 days since onset of symptoms) (A) and late illness (21  
738 to 28 days since onset of symptoms) (B). The antibody responses to the four regions were  
739 correlated with ACE2 blocking antibodies measured by the surrogate virus neutralization test,  
740 and the ACE2 blocking antibodies did not correlate with the levels of the four  
741 immunodominant regions (C). The Mann-Whitney U test (two-tailed) was used to determine  
742 the differences in antibody levels between those with mild and severe disease. All tests were  
743 two sided. The error bars indicate the median and the interquartile ranges.

744

#### 745 **Supplementary figure legends**

746 **Supplementary Figure 1: Mapping of antibody responses in the different cohorts to**  
747 **identify immunodominant regions within the pools of overlapping peptides.**

748 IgG antibody responses were measured by an in-house ELISA for individual overlapping  
749 peptides of pool 1 (peptide 1 to 15) in omicron + vaccinated (A) and Sinopharm vaccinees  
750 (B), pool 2 (peptide 16 to 30) in WT infected (C), and omicron+ vaccinated (D), pool 3  
751 (peptide 31 to 45) delta infected (E) and omicron + vaccinated (F) and in pool 4 in delta  
752 infected(G) and omicron+ vaccinated (H). 10 individuals were included in each cohort to  
753 identify individual antibody responses. The error bars indicate the median and the  
754 interquartile ranges.

755

756

757



**A**

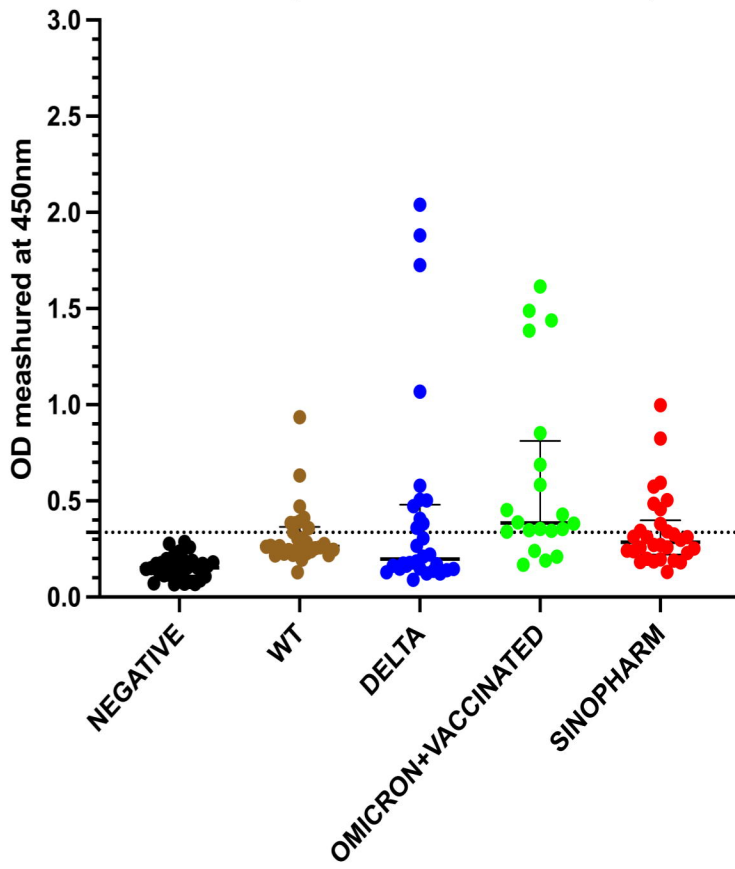

**B**

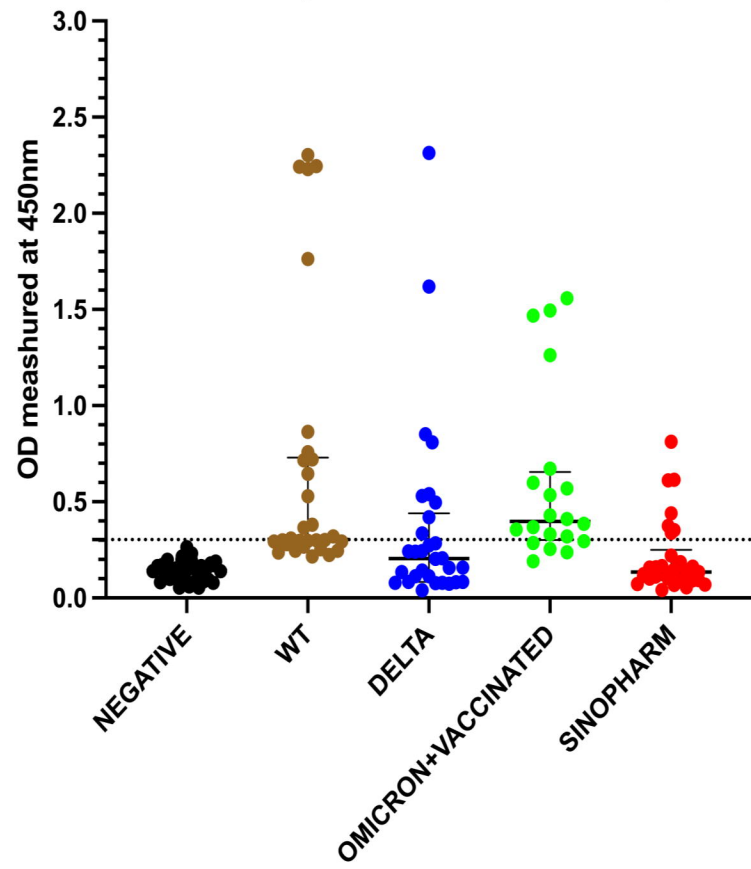

**C**

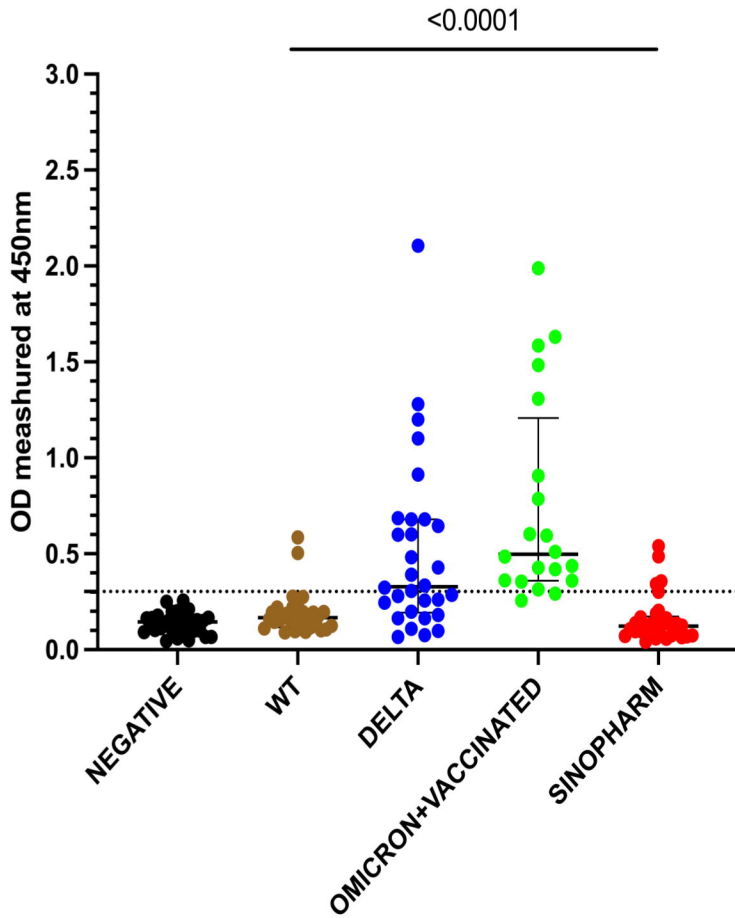

**D**

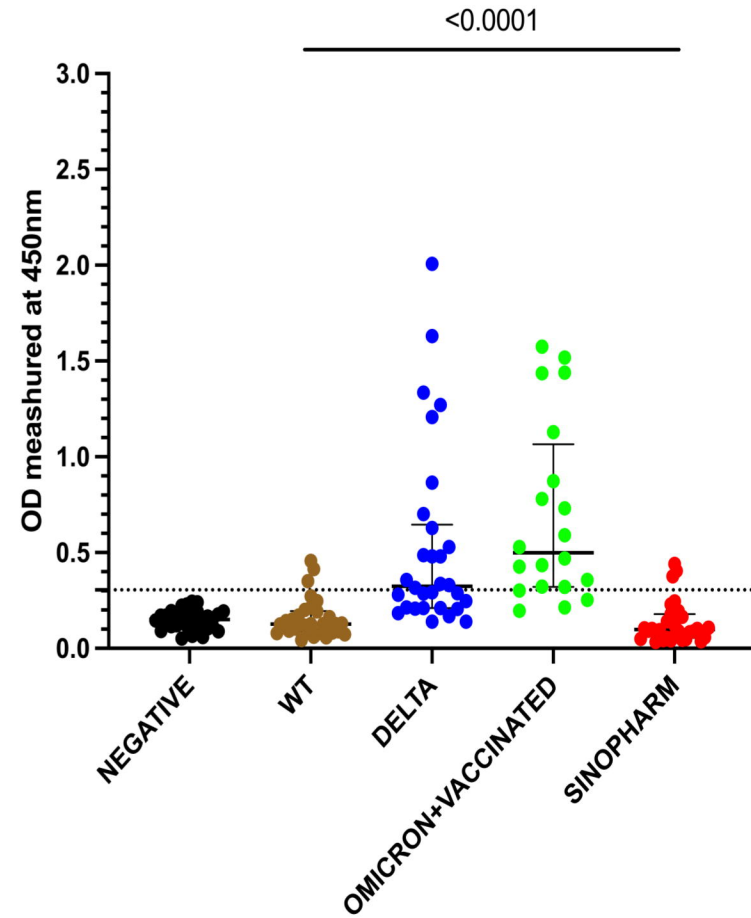

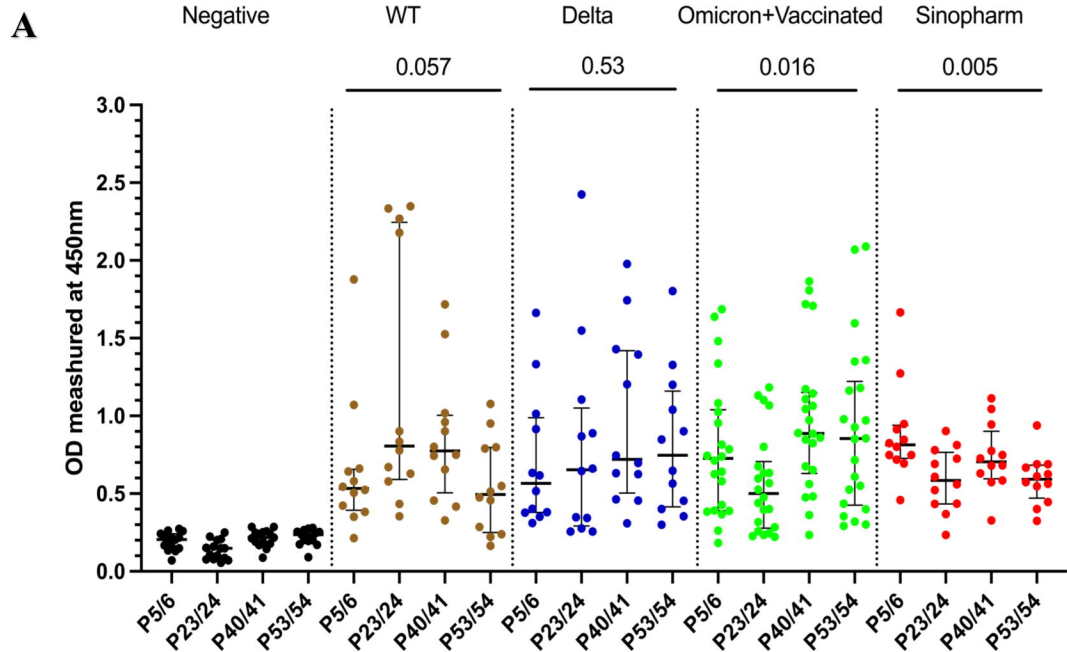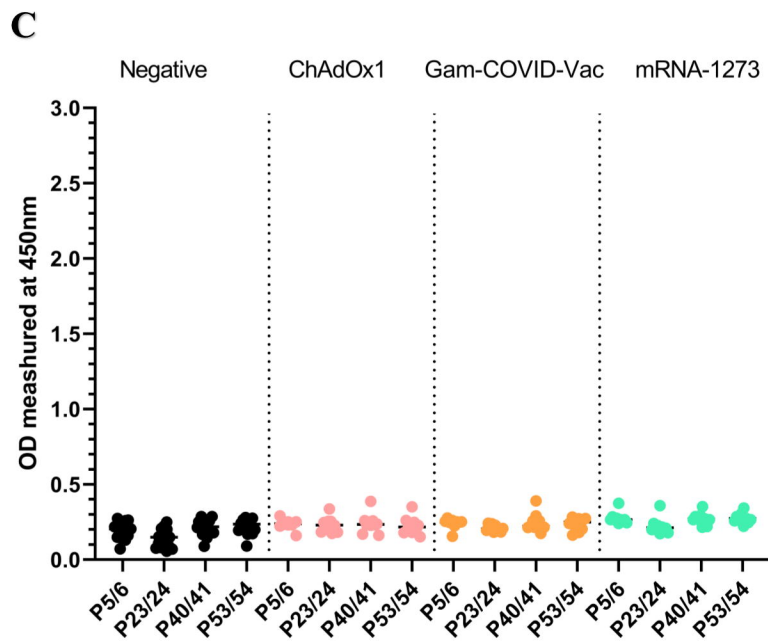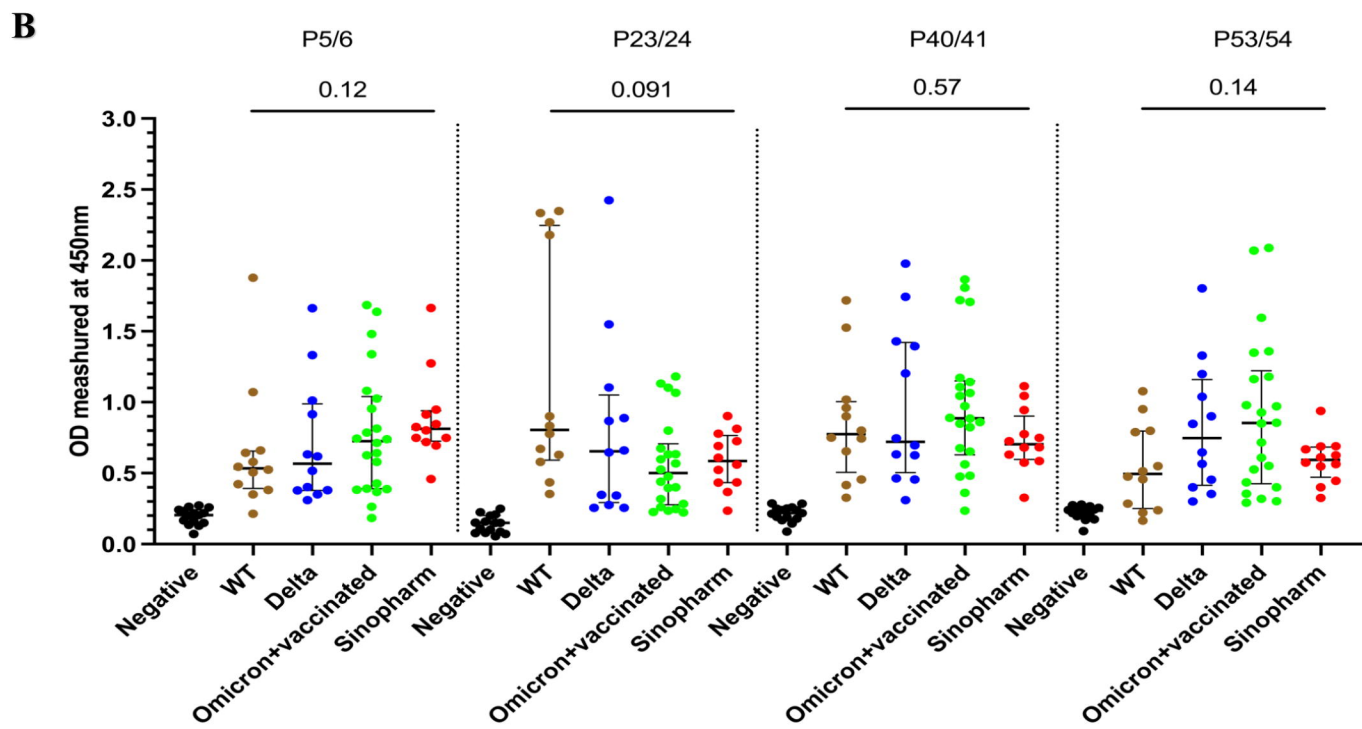

**A**

YP\_009724397.2\_Wild\_type/29-52 29 **NGERSGARSKQRRPQGLPNN** . . . . . **TASW**  
 QBP84763.1\_OC43/35-65 35 **NVQTRGRRAQPKQTSTSQQP**SGGNVVPYY**SW**  
 ABG77571.1\_HKU\_1/36-64 36 **QTFNRGRKTQPKFTVSTQPQ** . . GNTIPHY**SW**  
 YP\_003771.1\_NL63/7-21 7 **ADDRAARKKFP**PP . . . . . **SF**

**B**

YP\_009724397.2\_Wild\_type/155-171 155 **AAIVLQLPQGTTLPKGFYAEGSRG**  
 QBP84763.1\_OC43/170-192 170 **EAIPTRFNPGTVLNQGIYIEKS** . G  
 ABG77571.1\_HKU\_1/169-191 169 **EAIPTRFNPGTILNQGIYVEKS** . G  
 YP\_003771.1\_NL63/123-146 123 **LEPKFSIALPPELSVVEFEDRS**NN

**C**

YP\_009724397.2\_Wild\_type/274-300 274 **FGRRGPEQTQGNFGDQELIRQGT**DQKK  
 QBP84763.1\_OC43/286-309 286 **FGKRGFNI** . . . **NFGGGEM**LKLGTSQGE  
 ABG77571.1\_HKU\_1/284-307 284 **FGKRGFSI** . . . **NFGNAEM**LKLGTNPEL  
 YP\_003771.1\_NL63/250-271 250 **FGPRDFNH** . . . **NMGDS**DLVQNGVDK . .

**D**

YP\_009724397.2\_Wild\_type/365-381 365 **PTEPKKDKKKKADETQALPQRQKK**  
 QBP84763.1\_OC43/382-405 382 **QQDGMNMSPK**PQRQRGLKNGQGE  
 ABG77571.1\_HKU\_1/380-403 380 **QNTVSGSLSPK**PQRKRGVKQSP  
 YP\_003771.1\_NL63/338-359 338 **MQSQSSHVAQNTV**LNASIPESK . .

**E**

medRxiv preprint doi: <https://doi.org/10.1101/2023.01.05.23284247>; this version posted January 7, 2023. The copyright holder for this preprint (which was not certified by peer review) is the author/funder, who has granted medRxiv a license to display the preprint in perpetuity. It is made available under a [CC-BY-NC 4.0 International license](https://creativecommons.org/licenses/by-nc/4.0/).

YP\_009724397.2\_Wild\_type/29-52 29 **NGERSGARSKQRRPQGLPNNTASW**  
 QVX37034.1\_Alpha/29-52 29 **NGERSGARSKQRRPQGLPNNTASW**  
 QWW93444.1\_Beta/29-52 29 **NGERSGARSKQRRPQGLPNNTASW**  
 QXF23757.1\_Gamma/29-52 29 **NGERSGARSKQRRPQGLPNNTASW**  
 UKA47847.1\_Delta/29-52 29 **NGERSGARSKQRRPQGLPNNTASW**  
 aicbu4463/2022\_BA2/29-49 29 **NG** . . . **GARSKQRRPQGLPNNTASW**  
 aicbu4450/2022\_BA1/29-49 29 **NG** . . . **GARSKQRRPQGLPNNTASW**  
 CDPH-FS27225444/2022\_BA5/29-49 29 **NG** . . . **GARSKQRRPQGLPNNTASW**

**F**

YP\_009724397.2\_Wild\_type/57-80 57 **AAIVLQLPQGTTLPKGFYAEGSRG**  
 QVX37034.1\_Alpha/57-80 57 **AAIVLQLPQGTTLPKGFYAEGSRG**  
 QWW93444.1\_Beta/57-80 57 **AAIVLQLPQGTTLPKGFYAEGSRG**  
 QXF23757.1\_Gamma/57-80 57 **AAIVLQLPQGTTLPKGFYAEGSRG**  
 UKA47847.1\_Delta/57-80 57 **AAIVLQLPQGTTLPKGFYAEGSRG**  
 aicbu4463/2022\_BA2/54-77 54 **AAIVLQLPQGTTLPKGFYAEGSRG**  
 aicbu4450/2022\_BA1/54-77 54 **AAIVLQLPQGTTLPKGFYAEGSRG**  
 CDPH-FS27225444/2022\_BA5/54-77 54 **AAIVLQLPQGTTLPKGFYAEGSRG**

**G**

YP\_009724397.2\_Wild\_type/176-199 176 **FGRRGPEQTQGNFGDQELIRQGT**D  
 QVX37034.1\_Alpha/176-199 176 **FGRRGPEQTQGNFGDQELIRQGT**D  
 QWW93444.1\_Beta/176-199 176 **FGRRGPEQTQGNFGDQELIRQGT**D  
 QXF23757.1\_Gamma/176-199 176 **FGRRGPEQTQGNFGDQEL**TRQGT  
 UKA47847.1\_Delta/176-199 176 **FGRRGPEQTQGNFGDQELIRQGT**D  
 aicbu4463/2022\_BA2/173-196 173 **FGRRGPEQTQGNFGDQELIRQGT**D  
 aicbu4450/2022\_BA1/173-196 173 **FGRRGPEQTQGNFGDQELIRQGT**D  
 CDPH-FS27225444/2022\_BA5/173-196 173 **FGRRGPEQTQGNFGDQELIRQGT**D

**H**

YP\_009724397.2\_Wild\_type/267-290 267 **PTEPKKDKKKKADETQALPQRQKK**  
 QVX37034.1\_Alpha/267-290 267 **PTEPKKDKKKKADETQALPQRQKK**  
 QWW93444.1\_Beta/267-290 267 **PTEPKKDKKKKADETQALPQRQKK**  
 QXF23757.1\_Gamma/267-290 267 **PTEPKKDKKKKADETQALPQRQKK**  
 UKA47847.1\_Delta/267-290 267 **PTEPKKDKKKKA**Y**ETQALPQRQKK**  
 aicbu4463/2022\_BA2/264-287 264 **PTEPKKDKKKKADETQALPQRQKK**  
 aicbu4450/2022\_BA1/264-287 264 **PTEPKKDKKKKADETQALPQRQKK**  
 CDPH-FS27225444/2022\_BA5/264-287 264 **PTEPKKDKKKKADETQALPQRQKK**

**A**

*ATO98129.1\_RS4081/30-53*  
*AGZ48841.1\_WIV1/30-53*  
*QHR63308.1\_RaTG13/29-52*  
*ABD75315.1\_Rf1/29-52*  
*YP\_009724397.2\_Wild\_Type/29-52*

NGGRNGARPKQRRPQGLPNNTASW  
NGGRNGARPKQRRPQGLPNNTASW  
NGERSGARPKQRRPQGLPNNTASW  
DGRSGARPKQRRPQGLPNNTASW  
NGERSGARSKQRRPQGLPNNTASW

**B**

*ATO98129.1\_RS4081/156-179*  
*AGZ48841.1\_WIV1/156-179*  
*QHR63308.1\_RaTG13/155-178*  
*ABD75315.1\_Rf1/155-178*  
*YP\_009724397.2\_Wild\_Type/155-179*

AATVLQLPQGTTLPKGFYAEGSRG  
AATVLQLPQGTTLPKGFYAEGSRG  
AAIVLQLPQGTTLPKGFYAEGSRG  
AAIVLQLPQGTTLPKGFYAEGSRN  
AAIVLQLPQGTTLPKGFYAEGSRG

**C**

*ATO98129.1\_RS4081/275-298*  
*AGZ48841.1\_WIV1/275-298*  
*QHR63308.1\_RaTG13/274-297*  
*ABD75315.1\_Rf1/274-297*  
*YP\_009724397.2\_Wild\_Type/274-298*

FGRRGPEQTQGNFGDQDLIRQGTD  
FGRRGPEQTQGNFGDQDLIRQGTD  
FGRRGPEQTQGNFGDQELIRQGTD  
FGRRGPDQTQGNFGDQELIRQGTD  
FGRRGPEQTQGNFGDQELIRQGTD

**D**

*ATO98129.1\_RS4081/366-389*  
*AGZ48841.1\_WIV1/366-389*  
*QHR63308.1\_RaTG13/365-388*  
*ABD75315.1\_Rf1/365-388*  
*YP\_009724397.2\_Wild\_Type/365-389*

PTEPKKDKKKKTDEAQPLPQRQKK  
PTEPKKDKKKKTDEAQPLPQRQKK  
PTEPKKDKKKKADETQALPQRQKK  
PTEPKKDKKKKTDEAQPLPQRQKK  
PTEPKKDKKKKADETQALPQRQKK

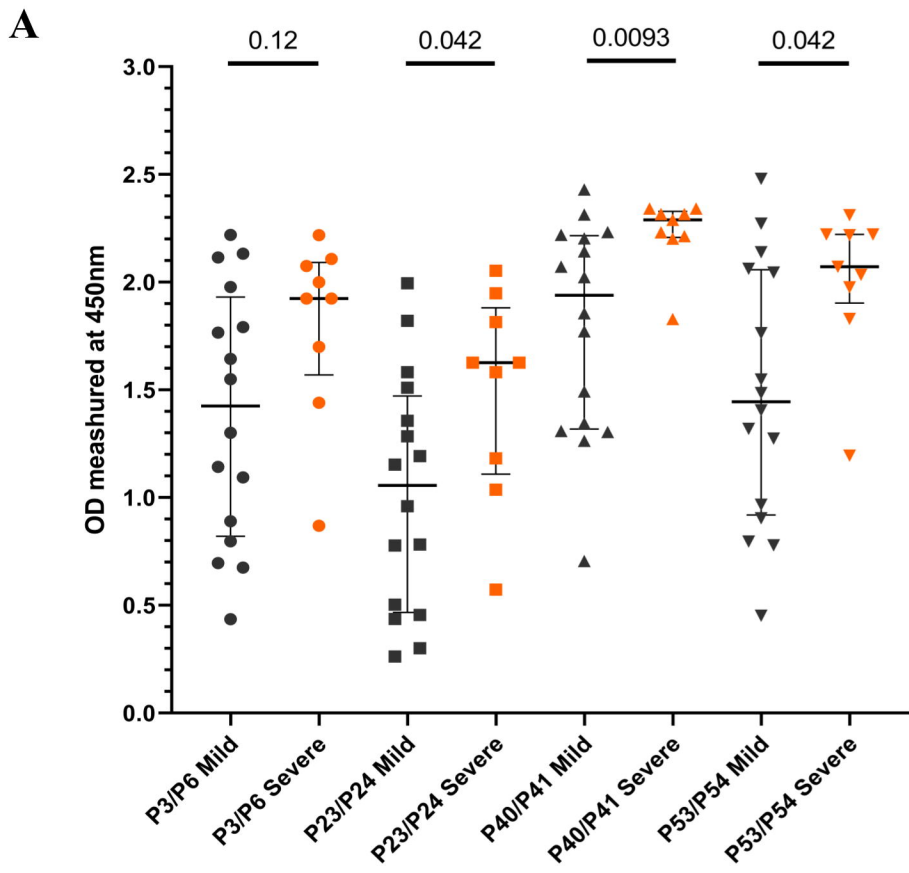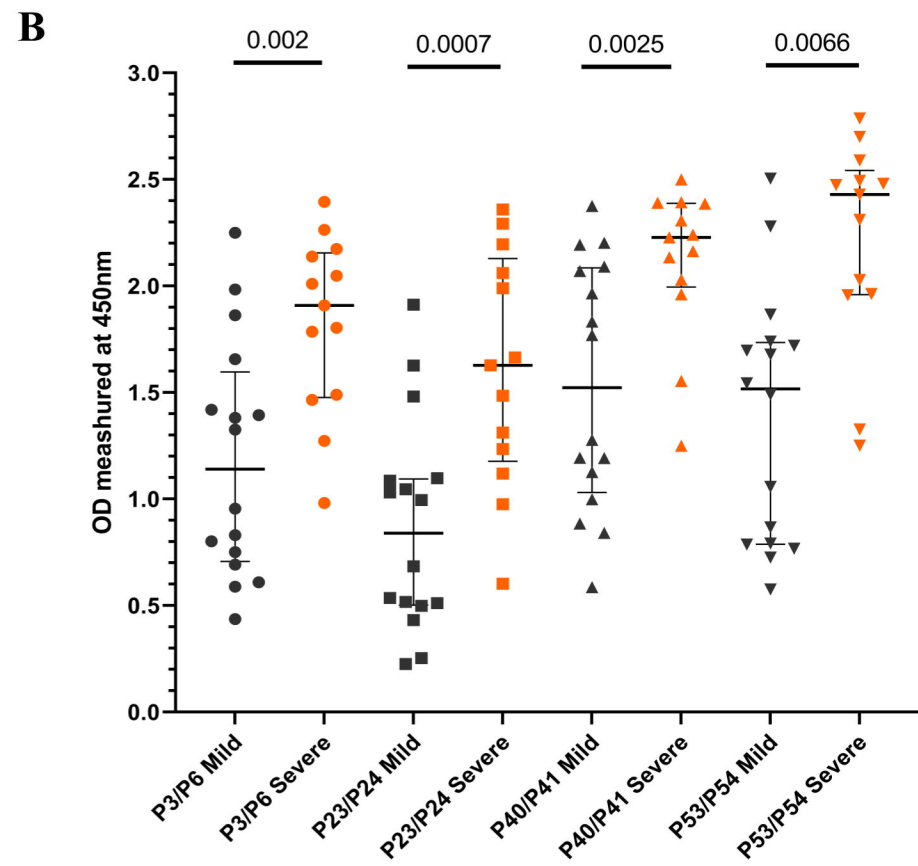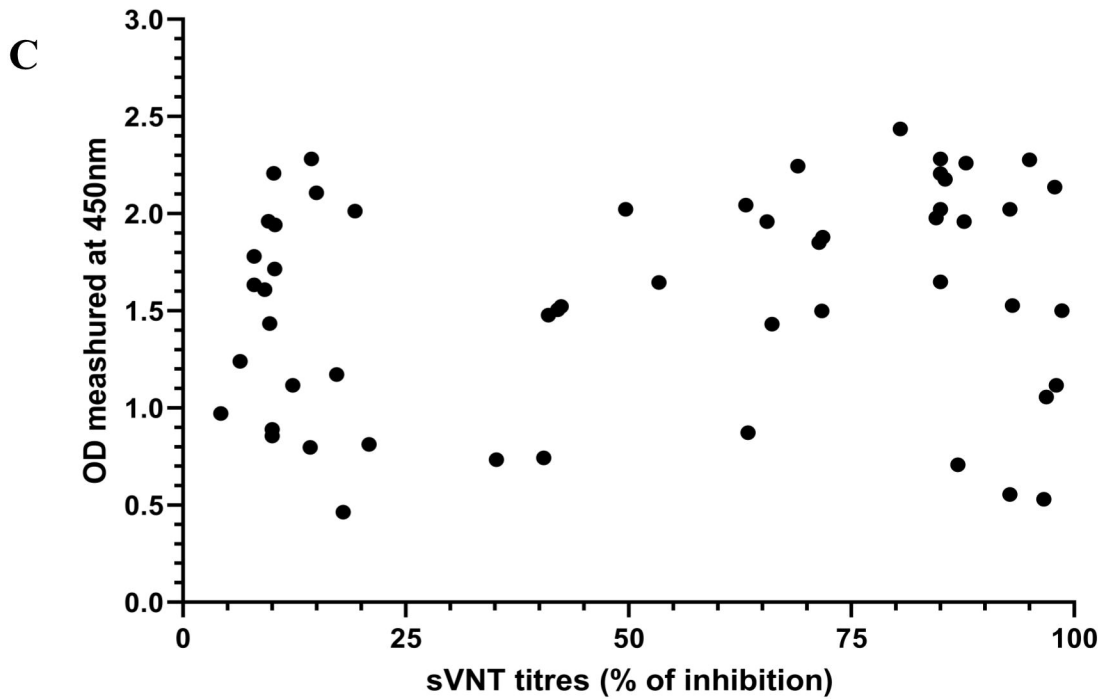

Source: https://medrxiv.org/content/10.1101/2023.01.05.23284247v1.full.pdf
